# Supplementary material
Source: PubMed Central journal article supplement (PMC2806098)
Supplement: 00257.2009_1.pdf [file 00257.2009_1.pdf]

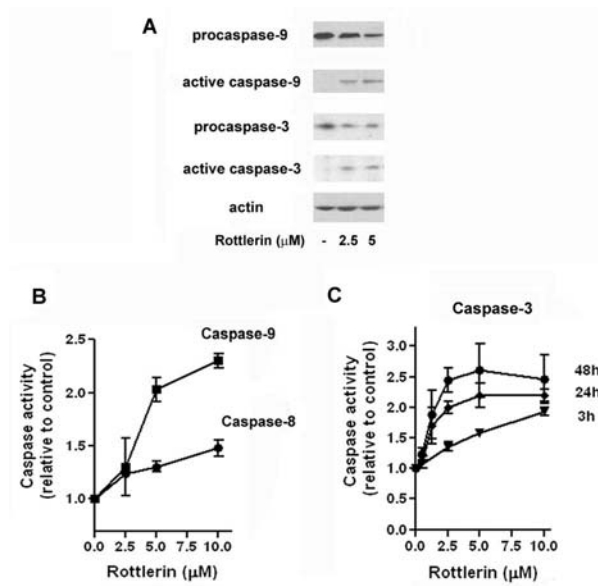

Ohno et al Figure S1

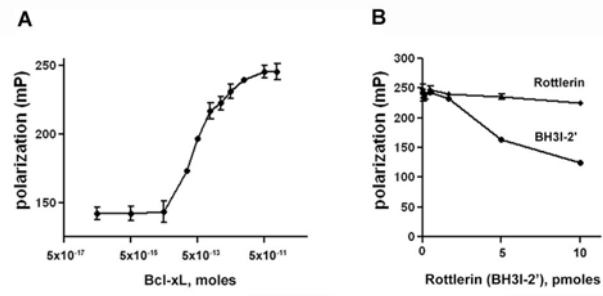

Ohno et al Figure S2

**Figure S1. Rottlerin stimulated caspase-9 and -3 but not caspase-8 activity in MIA PaCa-2 cells.**

(A-C) MIA PaCa-2 cells were cultured for 48h (A, B) or indicated time (C) with indicated concentrations of rottlerin. (A) Caspase-9 and -3 processing was measured by western blot. Immunoblots are representative of 3 independent experiments which all gave the same results. (B, C) Caspase-9, -8 and -3 activities were measured with a fluorogenic assay using substrates specific for caspase-9 (Ac-LEHD-AMC), caspase-8 (Ac-IETD-AMC) and caspase-3 (Ac-DEVD-AMC). The values are means  $\pm$ SE n=4.

**Figure S2. BH3I-2' but not rottlerin disrupted the complex of Bcl-xL with BH3 domain of Bad in cell free system.**

Fluorescence polarization was measured in the mixture of recombinant Bcl-xL at indicated concentrations (A) or 100 nM (B) 15 nM FITC-labeled Bad, and without (A) or with (B) indicated amounts of rottlerin or BH3I-2'. Values are means  $\pm$ SE (n=3).
